# Supplementary material for: Performance enhancement of carbon nanotube thin film transistor by yttrium oxide capping
Source: Royal Society of Chemistry journal article supplement (doi:10.1039/c7nr08676h), 2018-01-01
Supplement: c7nr08676h1.pdf [file c7nr08676h1.pdf]

## Supporting Information

### Performance enhancement of carbon nanotube thin film transistor by yttrium oxide capping

Jiye Xia<sup>1</sup>, Jie Zhao<sup>1</sup>, Hu Meng<sup>2</sup>, Qi Huang<sup>1</sup>, Guodong Dong<sup>1</sup>, Han Zhang<sup>1</sup>, Fang Liu,  
Defeng Mao<sup>2</sup>, Xuelel Liang<sup>1,\*</sup>, Lianmao Peng<sup>1,\*</sup>

<sup>1</sup>Key Laboratory for the Physics and Chemistry of Nanodevices and Department of Electronics,  
Peking University, Beijing 100871, P. R. China;

<sup>2</sup>BOE Technology Group Co., Ltd., Beijing 100176, P. R. China

#### S1. Y<sub>2</sub>O<sub>3</sub> capping results of CNT-TFTs on Si substrate

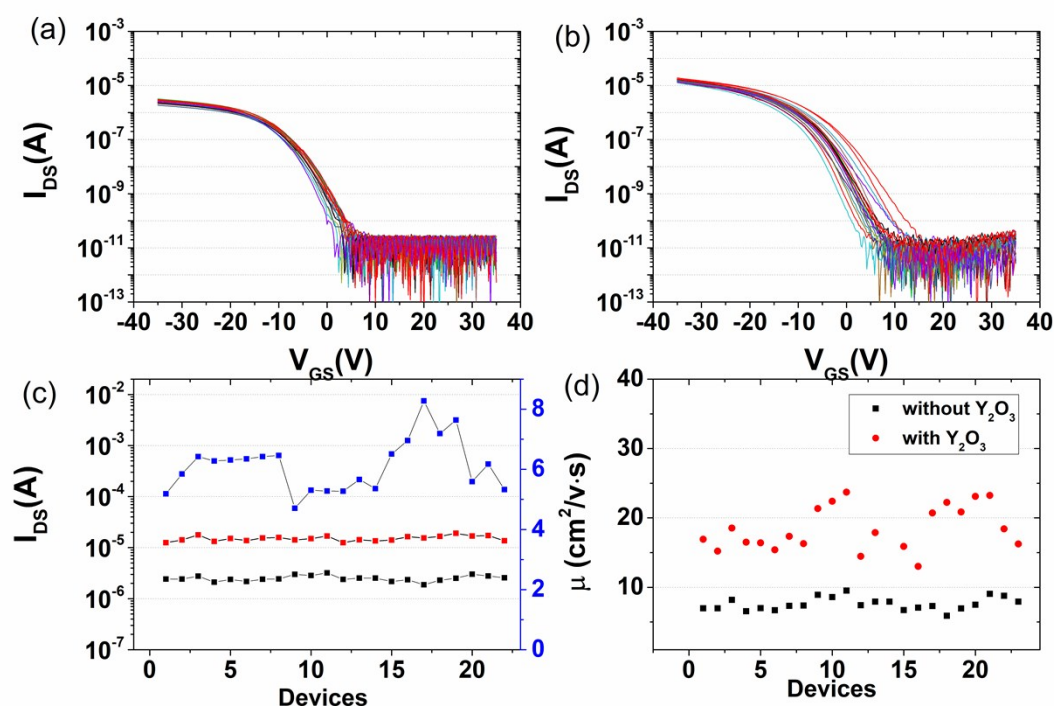

Fig. S1 Transfer characteristics of 22 CNT-TFTs before (a) and after (b) Y<sub>2</sub>O<sub>3</sub> capping. These devices, (W, L) = (20μm, 10μm), were measured at  $V_d = -1$  V. (c)  $I_{on}$  of CNT-TFTs before (black), after (red) Y<sub>2</sub>O<sub>3</sub> capping and their ratios, which were measured at  $V_g = -35$  V. (blue). (d) Extracted hole mobility correspondingly.

**S2. Typical SEM image of deposited CNT thin film. The tube density is  $\sim 20$  tube/ $\mu\text{m}$ .**

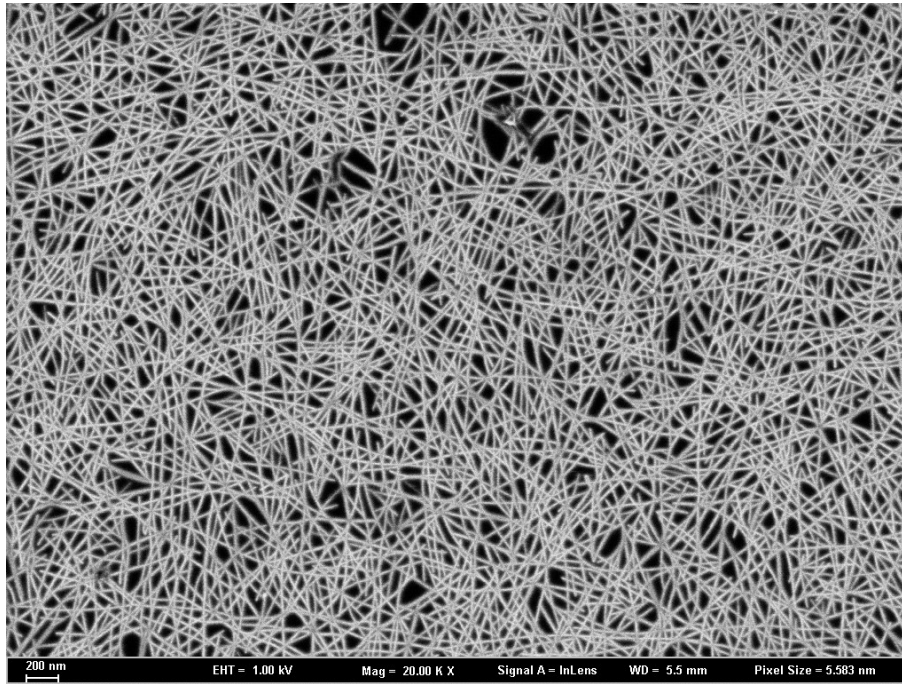

Fig. S2

**S3.  $I_{\text{on}}$  of CNT-TFTs measured at the same gate voltage**

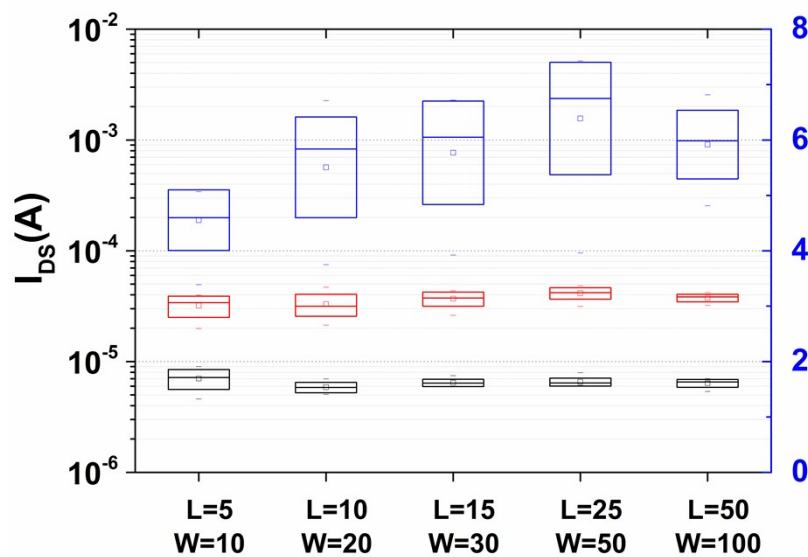

Fig. S3  $I_{\text{on}}$  of CNT-TFTs measured at the same gate voltage ( $V_g = -10\text{V}$ ), which are in correspondence with Fig. 2b in the main text. Black: before  $\text{Y}_2\text{O}_3$  capping, red: after capping, blue: ratio of after to before.

**S4 Typical results of  $\text{Y}_2\text{O}_3/\text{Al}_2\text{O}_3$  passivated CNT-TFTs with various channel geometries.**

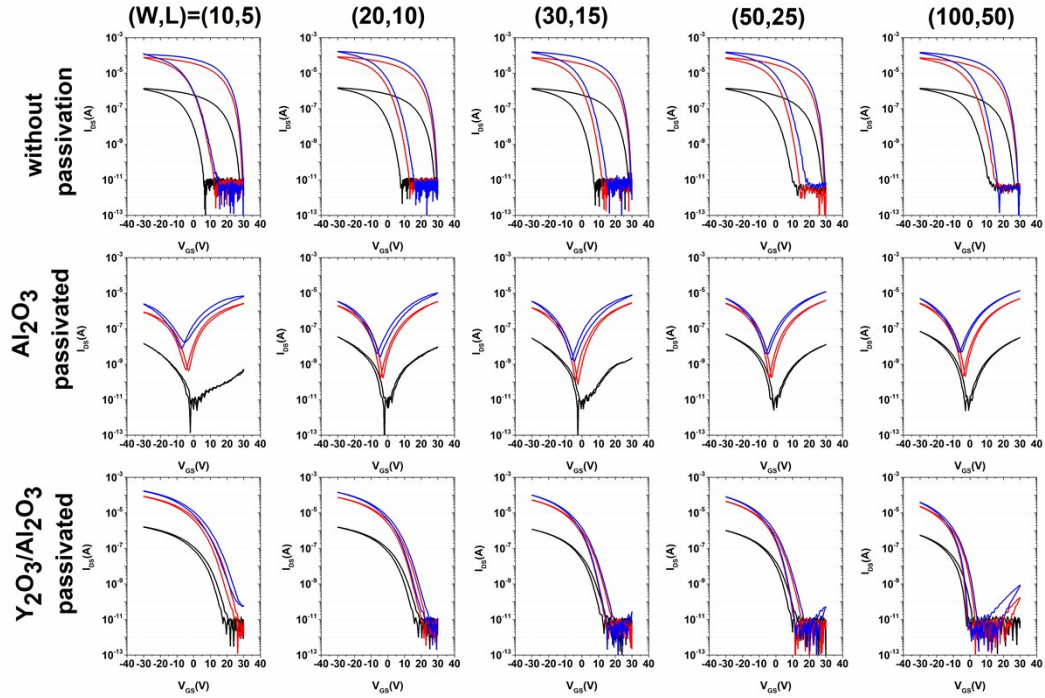

**S5 Typical results of  $\text{Y}_2\text{O}_3/\text{Al}_2\text{O}_3$  passivated CNT-TFTs on glass substrates.**

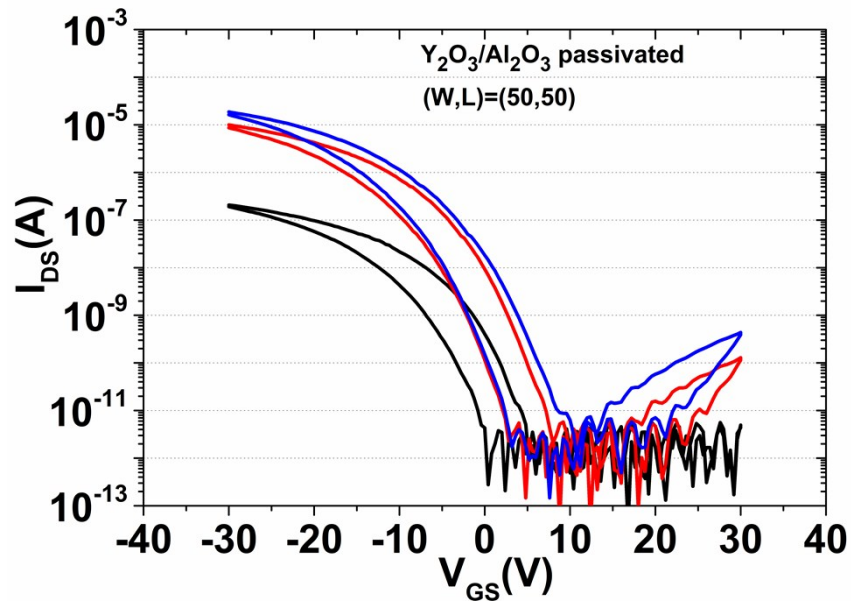

The device geometry is the same as those in Fig. 1 of the main text.
